RESEARCH ARTICLE

# The performance of stroke survivors in turning-while-walking while carrying out a concurrent cognitive task compared with controls

Wing-nga Chan, William Wai-nam Tsang\*

Department of Rehabilitation Sciences, Hong Kong Polytechnic University, Hong Kong SAR, China

\* [William.Tsang@polyu.edu.hk](mailto:William.Tsang@polyu.edu.hk)

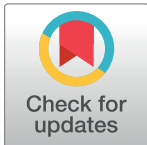

## Abstract

### Background

Turning-while-walking is one of the commonest causes of falls in stroke survivors. It involves cognitive processing and may be challenging when performed concurrently with a cognitive task. Previous studies of dual-tasking involving turning-while-walking in stroke survivors show that the performance of physical tasks is compromised. However, the design of those studies did not address the response of stroke survivors under dual-tasking condition without specifying the task-preference and its effect on the performance of the cognitive task.

### Objective

First, to compare the performance of single-tasking and dual-tasking in stroke survivors.  
Second, to compare the performance of stroke survivors with non-stroke controls.

### Methods

Fifty-nine stroke survivors and 45 controls were assessed with an auditory Stroop test, a turning-while-walking test, and a combination of the two single tasks. The outcome of the cognitive task was measured by the reaction time and accuracy of the task. The physical task was evaluated by measuring the turning duration, number of steps to turn, and time to complete the turning-while-walking test.

### Results

Stroke survivors showed a significantly reduced accuracy in the auditory Stroop test when dual-tasking, but there was no change in the reaction time. Their performance in the turning-while-walking task was similar under both single-tasking and dual-tasking condition. Additionally, stroke survivors demonstrated a significantly longer reaction time and lower accuracy than the controls both when single-tasking and dual-tasking. They took longer to turn, with more steps, and needed more time to complete the turning-while-walking task in both tasking conditions.

## OPEN ACCESS

**Citation:** Chan W-n, Tsang WW-n (2017) The performance of stroke survivors in turning-while-walking while carrying out a concurrent cognitive task compared with controls. PLoS ONE 12(12): e0189800. <https://doi.org/10.1371/journal.pone.0189800>

**Editor:** Jong-Ling Fuh, Taipei Veterans General Hospital, TAIWAN

**Received:** April 27, 2017

**Accepted:** December 2, 2017

**Published:** December 22, 2017

**Copyright:** © 2017 Chan, Tsang. This is an open access article distributed under the terms of the [Creative Commons Attribution License](https://creativecommons.org/licenses/by/4.0/), which permits unrestricted use, distribution, and reproduction in any medium, provided the original author and source are credited.

**Data Availability Statement:** All data files are available from the figshare database at <https://doi.org/10.6084/m9.figshare.4924034.v1>.

**Funding:** The authors received no specific funding for this work.

**Competing interests:** The authors have declared that no competing interests exist.

## Conclusions

The results show that stroke survivors with high mobility function performed the auditory Stroop test less accurately while preserving simultaneous turning-while-walking performance. They also demonstrated poorer performance in both single-tasking and dual-tasking as compared with controls.

## Introduction

Turning-while-walking is a common daily activity [1]. It has been suggested that turning is not automatic but requires cognitive processing to provide feedback control [2]. Information from various sensory systems, including the visual system, vestibular system and somatosensory system, are integrated throughout the movement, and the body adjusts accordingly [3, 4]. In turning-while-walking, it has been suggested that failing to adjust the movement from the already coordinated straight line walking may result in loss of balance or even a fall [5]. Indeed, turning is among the activities most frequently reported to cause a fall in older people with stroke [3]. Falling during a turn is 7.9 times more likely to result in a hip fracture in stroke survivors than walking in a straight line [1]. Previous studies have shown that a stroke affects the performance of turning-while-walking. Stroke survivors took a longer time to turn and needed more steps than their age-matched counterparts [6, 7]. In addition, they turned more slowly with less displacement of the center of mass in the mediolateral direction [8]. The reorientation sequence of body segments was also disrupted [9].

Performing two tasks simultaneously, such as responding to an external distraction while walking, is common in everyday life. This dual-tasking ability has been shown to be related to both falls [10] and functional ability [11]. Based on the theory of competition for attentional resources, dual-tasking performance is suggested to be affected by several factors: 1) fewer attentional resources are available to perform two tasks concurrently, 2) inability to allocate resources between the two tasks correctly, 3) increased resource requirement to carry out the individual tasks, and 4) a combination of these factors [12]. If any of these factors are present, the performance of either or both tasks will be downgraded.

Many studies have been conducted to investigate dual-tasking ability in stroke survivors [10, 11, 13] but the number investigating turning-while-walking is limited. The available studies consistently showed that an additional cognitive task has a detrimental effect on the turning-while-walking performance [14–17]. However, there are questions that those studies could not answer. First, in some of the studies subjects were asked to prioritize the cognitive task over the physical task [14–16]. Therefore, it is not clear which task the subjects would naturally prioritize without this instruction. Further, the level of performance of the cognitive task under dual-tasking conditions was not given by the available studies. They either did not compare changes in cognitive task performance from single-tasking to dual-tasking [17] or did not consider the performance in the statistical analysis [14–16]. Therefore, it is not clear whether the subjects also compromised the cognitive task under dual-tasking conditions. Moreover, the cognitive task (serial subtraction) employed in these studies uses internal interference. The response of stroke survivors to a dual-tasking condition involving an external disturbance, which is common in daily life, is yet to be determined.

Therefore, this study was conducted to investigate the natural response of stroke survivors to a dual-tasking challenge involving turning-while-walking as the physical task. This study had two aims:

1. To compare single-tasking and dual-tasking performance in stroke survivors. We hypothesized that the performance of both tasks would be degraded when dual-tasking.
2. To compare the performance of stroke survivors with non-stroke controls. We postulated that stroke survivors would have a lower dual-tasking ability than the controls due to a decreased ability to conduct the individual tasks, as reflected by the single-tasking performance. We also hypothesized that the effect of dual-tasking would be greater in the stroke survivors than the controls, which was examined by comparing the dual-task cost between the two groups.

## Method

### Participants

Stroke survivors were recruited from local mutual self-help groups. The control subjects were recruited in the community. Eligible subjects were aged 50 or above, able to walk unaided for at least 15 meters indoor without physical assistance, and able to follow instructions. An additional criterion for subjects in the stroke survivor group was it having been at least six months since the onset of stroke. Subjects with any of the following conditions were excluded: a severe visual or hearing problem, a score of less than 18 in the Mini-Mental State Examination (MMSE) (Cantonese Version) [18], any neurological disease (other than stroke in the stroke survivor group) or any musculoskeletal trauma or medical operation within the previous six months. This study was approved by the Ethics Committee of the Hong Kong Polytechnic University. The aims and procedures were explained to all participants before they gave their informed consent.

### Procedures

Demographic data including gender, age, height, weight, and mobility function [the timed Up-and-Go test (TUGT) and the Berg Balance Scale (BBS)] were obtained before the assessment. For the stroke subjects, chronicity, side, number and type of stroke were collected. All of the subjects were assessed with a single cognitive task (auditory Stroop test), a single physical task (turning-while-walking test), and a combination of the two single tasks. Detailed procedures were explained and familiarization trials were given to all the subjects before the assessment. The sequence of testing the three conditions was randomized to minimize any learning effect.

**Single auditory Stroop test.** The auditory Stroop test was designed to assess the executive function, including working memory, selective attention, and ability to inhibit automatic responses [19, 20]. In this test, two pre-recorded words, “high” and “low,” were pronounced in two different pitches, high and low, to form four combinations. The subjects were instructed to ignore the meaning of the word and respond to its pitch as quickly and as accurately as possible. A two-button switch, with each button representing the high and low pitch respectively, was given to the subject to react to the auditory Stroop test. Stroke subjects held the switch with the less affected hand, while controls held it with the dominant hand (defined as the hand used for writing). Each combination of word and pitch was tested three times for each subject in a randomized sequence.

The reaction times and accuracy of the responses were recorded using custom-made software (LabVIEW version 8.6, National Instruments Corp., Austin, TX, USA). The reaction time was defined as the period from the start of the sound to the button press. The average reaction time of the 12 trials was calculated for data analysis. The accuracy was calculated by dividing the number of correct responses by the total number of trials.

**Single turning-while-walking test.** In the single turning-while-walking test, the subjects were asked to walk a 5-meter straight line, make a 180-degree turn, and then return to the starting position as quickly and safely as possible [21]. A force platform (Model OR6-5-1000, Advanced Mechanical Technologies Inc., Newton, MA, USA) was installed in the walking surface five meters from the starting position. As the force platform was used to trigger the auditory Stroop test in the dual-tasking condition, no sound was produced in this single-tasking test. The subjects should press any button on the switch used in the auditory Stroop test while turning to make the data comparable with those from the dual-tasking tests. A research assistant walked closely behind the subject during the assessment to ensure safety. The subjects were allowed to use any walking aids or wear their ankle-foot orthosis as preferred.

A gyroscopic sensor system for gait analysis (Mobility Lab iWalk, OPAL sensors, APDM Inc., Portland, OR, USA) was used to record the turning performance. Sensors on the trunk and the lumbar region detected the moment when turning started and ended. Any step with more than 50% of its phase within the turning period was counted as a step within the turn [22, 23]. The test was repeated three times. Averages of the turning duration, number of steps to turn, and duration of the turning-while-walking test were employed for data analysis.

The subjects with stroke were asked to turn towards the affected side, as falls are more common when turning to this side [24]. Control subjects were tested turning to both sides. However, there was no significant difference in performance between the two turning sides ( $p > 0.05$ ). Thus, data from controls of all trials were combined for statistical analysis.

**Dual-tasking test.** In the dual-tasking test, subjects were required to perform the turning-while-walking test concurrently with the auditory Stroop test. The setting was the same as that of the single turning-while-walking test. The force platform installed on the walking surface triggered one of the four combinations of the sound of the auditory Stroop test when the subject stepped on it. Each of the four combinations was assessed once in a randomized sequence. The subjects were told that both tasks were equally important and no priority of the task was instructed. The parameters used in the single tasks were adopted in the dual-tasking condition. Any assistive devices used in the single-tasking test were used again.

**Dual-task cost.** The dual-task cost of each parameter of the cognitive task and the physical task was calculated to determine the change of performance between single-tasking and dual-tasking. As the single-tasking performance may vary between subjects, comparing the dual-task cost would take this baseline difference, if any, into consideration [25]. The dual-task cost was calculated as:

$$[(\text{single} - \text{tasking} - \text{dual} - \text{tasking}) / \text{single} - \text{tasking}] \times 100\% \quad (1)$$

For the accuracy measured by the auditory Stroop test, a positive value of the dual-task cost indicates a lower accuracy in the dual-tasking condition. For all other measures (reaction time of the auditory Stroop test, turning duration, number of steps to turn, and completion time of the turning-while-walking test), a negative dual-task cost value implies a decreased performance when dual-tasking.

**Test-retest reliability.** Test-retest reliabilities of the three tasking conditions were assessed. Thirteen stroke and nine control subjects were included. They were asked to take the assessments twice within two weeks. Subjects who had any change in medical, physical or cognitive condition or regular exercise habits within the test-retest period were excluded. The testing sequence in the retest session was identical to that of the first session.

## Statistical analysis

Commercial software, Statistical Package for the Social Sciences (SPSS)(version 23, IBM Corp., Armonk, NY, USA), was used for data analysis. Test-retest reliability was assessed with an intraclass correlation coefficient (ICC), model ICC (3,*k*), with '*k*' as the number of trials in the tests being assessed. The difference in demographic characteristics between the stroke survivors and controls were assessed with independent t-tests. The sex distribution between the two groups was compared with a chi-square test. Two-way mixed multivariate analysis of variance (MANOVA) was employed to investigate the task effect (single-tasking and dual-tasking), the group effect (stroke survivors and controls), and the interaction effect (task x group). If results were significant, further data analysis was conducted using the paired t-test for significant task effect and the independent t-test for significant group effect. Bonferroni adjustments were applied for all follow-up analyses. To compare the dual-task cost between stroke survivors and the controls, independent t-test was employed. The statistical significance level was set at 0.05.

## Results

### Participants

Forty-five controls and 59 stroke survivors participated in this study. The demographic data are shown in [Table 1](#). Gender, body height, MMSE score, TUGT, and BBS score were significantly different between the two groups.

### Test-retest reliability

Among the control subjects, the reliability of the three test conditions ranged from 0.72 to 0.91, indicating good to excellent reliability ([Table 2](#)). The intraclass correlation coefficient for the accuracy of the single-tasking auditory Stroop test could not be calculated as all subjects made no mistake, resulting in zero variance.

Among the stroke survivors, all of the parameters, except for the reaction time and accuracy of the auditory Stroop test under the dual-tasking condition, and the number of steps to turn in the single-tasking condition, indicated excellent reliability with ICC values over 0.90 ([Table 2](#)). The ICC (3,4) values for reaction time and accuracy in dual-tasking and the ICC (3,3) for number of steps to turn in single-tasking ranged from 0.62 to 0.85, indicating good reliability ([Table 3](#)).

### Comparing single-tasking and dual-tasking performance in stroke survivors

There was a significant difference between single-tasking and dual-tasking performance on the accuracy [ $F(1,99) = 12.175, p = 0.001$ ], but not the reaction time [ $F(1,99) = 3.902, p = 0.051$ ] of the auditory Stroop test. Follow-up analysis showed that stroke survivors made more errors under dual-tasking condition than in single-tasking ( $p = 0.001$ ) ([Table 4](#)).

By contrast with the cognitive task performance, no significant difference was found in the turning-while-walking performance between the single-tasking and dual-tasking conditions among the stroke survivors ( $p > 0.05$ ).

### Comparing stroke survivors and controls

There were significant differences between the two groups in all the parameters of both the cognitive and physical tasks.

**Table 1. Demographics of the controls and stroke survivors.**

|                                    | Control (n = 45)             | Stroke (n = 59)              | p-value  |
|------------------------------------|------------------------------|------------------------------|----------|
| Gender (Male: Female)              | 9: 36                        | 29: 30                       | 0.004*   |
| Age (years)                        | 61.3 ± 4.8<br>(51–69)        | 62.4 ± 6.8<br>(51–77)        | 0.337    |
| Height (cm)                        | 158.1 ± 6.7<br>(145.0–171.0) | 162.0 ± 8.5<br>(142.0–181.0) | 0.016*   |
| Weight (kg)                        | 61.1 ± 10.1<br>(45.0–89.0)   | 61.8 ± 11.4<br>(41.0–100.0)  | 0.712    |
| Years of education                 | 10.1 ± 3.5<br>(0–16)         | 9.5 ± 4.1<br>(1–18)          | 0.525    |
| MMSE                               | 29.4 ± 1.1<br>(25–30)        | 27.9 ± 2.2<br>(21–30)        | < 0.001* |
| TUGT (sec)                         | 6.3 ± 1.0<br>(4.5–9.4)       | 18.0 ± 8.9<br>(5.5–44.3)     | < 0.001* |
| BBS                                | 55.9 ± 0.3<br>(55–56)        | 48.1 ± 6.8<br>(31–56)        | <0.001*  |
| Time since onset of stroke (years) | N/A                          | 5.4 ± 4.8<br>(0.5–21.0)      | N/A      |
| Affected side                      | Right                        | 25                           |          |
|                                    | Left                         | 34                           |          |
| Type of stroke                     | Ischemic                     | 40                           |          |
|                                    | Haemorrhage                  | 17                           |          |
|                                    | Both                         | 2                            |          |
| Number of strokes                  | 1                            | 49                           |          |
|                                    | 2                            | 8                            |          |
|                                    | 3                            | 2                            |          |

Values are in mean ± SD (range); MMSE: Mini-Mental Status Examination; TUGT: Timed Up-and-go Test; BBS: Berg Balance Scale

\* denotes significant difference between stroke survivors and controls ( $p < 0.05$ )

<https://doi.org/10.1371/journal.pone.0189800.t001>

**Table 2. Test-retest reliability in the controls.**

|                       |                         | Time 1        | Time 2        | ICC (3,k)     | 95% CI |       |
|-----------------------|-------------------------|---------------|---------------|---------------|--------|-------|
|                       |                         |               |               |               | Lower  | Upper |
| <b>Single-tasking</b> |                         |               |               |               |        |       |
| Auditory Stroop test  | Reaction time (sec)     | 0.90 ± 0.20   | 0.93 ± 0.27   | 0.91          | 0.61   | 0.98  |
|                       | Accuracy (%)            | 100.00 ± 0.00 | 100.00 ± 0.00 | Zero variance |        |       |
| Turning-while-walking | Turning duration (sec)  | 5.96 ± 0.70   | 5.98 ± 0.62   | 0.76          | -0.08  | 0.95  |
|                       | Number of steps to turn | 8.95 ± 2.02   | 7.42 ± 1.25   | 0.89          | 0.51   | 0.98  |
|                       | Completion time (sec)   | 2.48 ± 0.46   | 2.22 ± 0.26   | 0.83          | 0.24   | 0.96  |
| <b>Dual-tasking</b>   |                         |               |               |               |        |       |
| Auditory Stroop test  | Reaction time (sec)     | 0.98 ± 0.30   | 0.92 ± 0.33   | 0.88          | 0.48   | 0.97  |
|                       | Accuracy (%)            | 91.67 ± 8.84  | 97.22 ± 5.51  | 0.73          | -0.36  | 0.95  |
| Turning-while-walking | Turning duration (sec)  | 5.96 ± 0.58   | 6.05 ± 0.38   | 0.72          | -0.23  | 0.94  |
|                       | Number of steps to turn | 8.55 ± 1.67   | 7.86 ± 2.32   | 0.90          | 0.55   | 0.98  |
|                       | Completion time (sec)   | 2.36 ± 0.33   | 2.25 ± 0.25   | 0.78          | 0.01   | 0.95  |

Values are in mean ± SD

<https://doi.org/10.1371/journal.pone.0189800.t002>

**Table 3. Test-retest reliability among the stroke survivors.**

|                       |                         | Time 1        | Time 2        | ICC (3,k) | 95% CI |       |
|-----------------------|-------------------------|---------------|---------------|-----------|--------|-------|
|                       |                         |               |               |           | Lower  | Upper |
| <b>Single-tasking</b> |                         |               |               |           |        |       |
| Auditory Stroop test  | Reaction time (sec)     | 1.14 ± 0.21   | 1.07 ± 0.16   | 0.95      | 0.77   | 0.99  |
|                       | Accuracy (%)            | 91.03 ± 11.52 | 89.29 ± 12.47 | 0.94      | 0.72   | 0.99  |
| Turning-while-walking | Turning duration (sec)  | 4.44 ± 1.41   | 4.24 ± 1.86   | 0.90      | 0.66   | 0.97  |
|                       | Number of steps to turn | 8.16 ± 1.51   | 8.00 ± 1.69   | 0.85      | 0.49   | 0.96  |
|                       | Completion time (sec)   | 16.49 ± 6.80  | 15.50 ± 6.78  | 0.96      | 0.86   | 0.99  |
| <b>Dual-tasking</b>   |                         |               |               |           |        |       |
| Auditory Stroop test  | Reaction time (sec)     | 1.12 ± 0.40   | 1.19 ± 0.31   | 0.62      | -0.41  | 0.90  |
|                       | Accuracy (%)            | 75.00 ± 28.87 | 85.42 ± 19.82 | 0.67      | -0.24  | 0.91  |
| Turning-while-walking | Turning duration (sec)  | 4.36 ± 1.74   | 4.11 ± 2.03   | 0.96      | 0.85   | 0.99  |
|                       | Number of steps to turn | 8.11 ± 2.13   | 7.73 ± 2.13   | 0.97      | 0.88   | 0.99  |
|                       | Completion time (sec)   | 15.95 ± 6.66  | 15.48 ± 6.85  | 0.95      | 0.82   | 0.99  |

Values are in mean ± SD

<https://doi.org/10.1371/journal.pone.0189800.t003>

In the auditory Stroop test, stroke survivors showed a significantly longer reaction time ( $p = 0.003$ ) and a lower accuracy ( $p = 0.015$ ) than the controls when dual-tasking. Results with the same significance were also found in the single-tasking condition (both  $p$ -values = 0.001) (Table 4).

For the turning-while-walking performance under the dual-tasking condition, stroke survivors took both a longer turning time and more steps than the controls (both  $p$ -values < 0.001). Subjects with stroke also needed more time to complete the turning-while-walking test ( $p < 0.001$ ). Similar differences between the two groups were also observed in the single-tasking condition (All  $p$ -values < 0.001) (Table 4).

Statistical comparison of dual-task cost revealed no significant difference in both the cognitive task and physical task between the stroke survivors and the controls (Table 5).

**Table 4. Results of the single-tasking and dual-tasking performance among the controls and the stroke survivors.**

|                       |                         | Controls (n = 45) |               | Stroke survivors (n = 59) |               | F-value (p-value)           |                                  |                    |
|-----------------------|-------------------------|-------------------|---------------|---------------------------|---------------|-----------------------------|----------------------------------|--------------------|
|                       |                         | Single-tasking    | Dual-tasking  | Single-tasking            | Dual-tasking  | Between-task difference     | Between-group difference         | Interaction effect |
| Auditory Stroop test  | Reaction time (sec)     | 0.96 ± 0.22       | 1.02 ± 0.30   | 1.17 ± 0.33               | 1.22 ± 0.33   | 3.902 (0.051)               | 14.818 (< 0.001) <sup>b, c</sup> | 0.021 (0.886)      |
|                       | Accuracy (%)            | 98.15 ± 3.93      | 89.72 ± 11.70 | 91.02 ± 10.05             | 81.25 ± 21.98 | 12.175 (0.001) <sup>a</sup> | 28.315 (< 0.001) <sup>b, d</sup> | 0.214 (0.645)      |
| Turning-while-walking | Turning duration (sec)  | 2.39 ± 0.44       | 2.41 ± 0.45   | 5.23 ± 2.43               | 5.35 ± 2.40   | 1.698 (0.196)               | 63.898 (< 0.001) <sup>b, c</sup> | 0.773 (0.381)      |
|                       | Number of steps to turn | 6.10 ± 0.74       | 6.23 ± 0.64   | 9.06 ± 2.18               | 9.13 ± 2.35   | 1.270 (0.263)               | 63.898 (< 0.001) <sup>b, c</sup> | 0.106 (0.746)      |
|                       | Completion time (sec)   | 7.98 ± 1.68       | 8.01 ± 1.59   | 21.23 ± 12.97             | 21.25 ± 12.36 | 0.033 (0.857)               | 48.831 (< 0.001) <sup>b, c</sup> | 0.000 (0.995)      |

Values are in mean ± SD

<sup>a</sup> Significant difference between single-tasking and dual-tasking in controls and stroke survivors ( $p = 0.001$ )

<sup>b</sup> Significant difference between controls and stroke survivors in single-tasking ( $p < 0.001$ )

<sup>c</sup> Significant difference between controls and stroke survivors in dual-tasking ( $p < 0.001$ )

<sup>d</sup> Significant difference between controls and stroke survivors in dual-tasking ( $p < 0.025$ )

<https://doi.org/10.1371/journal.pone.0189800.t004>

**Table 5. Results of the dual-task cost.**

|                       |                         | Controls (n = 45) | Stroke survivors (n = 59) | p-value |
|-----------------------|-------------------------|-------------------|---------------------------|---------|
| Auditory Stroop test  | Reaction time (sec)     | -7.5 ± 26.1       | -8.1 ± 27.5               | 0.922   |
|                       | Accuracy (%)            | 8.6 ± 11.7        | 10.7 ± 22.8               | 0.533   |
| Turning-while-walking | Turning duration (sec)  | -1.2 ± 7.5        | -2.5 ± 11.9               | 0.546   |
|                       | Number of steps to turn | -2.7 ± 8.9        | -0.9 ± 11.6               | 0.397   |
|                       | Completion time (sec)   | -0.7 ± 5.1        | -0.7 ± 8.6                | 0.985   |

Values are in mean ± SD

<https://doi.org/10.1371/journal.pone.0189800.t005>

## Discussion

This study examined how stroke survivors performed in dual-tasking that involved an auditory Stroop test and a turning-while-walking test. The results show that when dual-tasking, stroke survivors made more errors in the cognitive task with similar turning-while-walking performance. Further, stroke survivors demonstrated a longer reaction time and a lower accuracy in the auditory Stroop test by comparison with controls. They also took longer to turn with more steps and needed more time to complete the turning-while-walking test. However, there was no significant difference in dual-task cost in both the cognitive task and physical task between the two groups.

In this study, stroke survivors responded to dual-tasking with reduced accuracy in the auditory Stroop test but with similar performance of the physical task. According to the theory of competition for attentional resources in dual-tasking [12, 26, 27], the results may imply that, at least in these conditions, stroke survivors may not have sufficient resources to perform both tasks concurrently. However, the hypothesis of interference between the cognitive and physical tasks when dual-tasking was only partly supported. This unexpected result can be explained by a posture-first strategy [27]. It is suggested that when dual-tasking, if the physical task is too complex that it may place a postural threat on an individual, or if the individual is not capable of performing the task due to physical impairment, attentional resources are drawn from the cognitive task to the postural task to maintain balance [3, 28]. This strategy would be a safety measure to prevent a fall and is commonly seen in older adults, people with impaired balance [26] or when the physical task is challenging [13, 29]. The results of this study may imply that stroke survivors prioritize the physical task over the cognitive task to maintain balance during turning.

The result that stroke survivors prioritized the physical task over the cognitive one was inconsistent with previous studies that showed a compromised turning-while-walking performance when dual-tasking [14–17]. A possible explanation for this discrepancy is the instruction given on task prioritization. In the studies by Manaf’s research team, subjects were instructed to prioritize the cognitive task over the physical task [14–16]. Conversely, subjects in our study were told that both tasks were equally important and the task priority was not specified. It has been proposed that directing the priority of tasks may affect an individual’s response to a dual-tasking challenge [17]. In the absence of a specific instruction about the priority of tasks, stroke survivors were able to naturally react to the dual-tasking challenge. In addition, the nature of the cognitive task may affect the results of dual-tasking. In daily life, disturbances to physical movement could be triggered internally by an individual or externally by the environment. The cognitive task used in previous studies [14–17], serial subtraction, involves an internal interfering factor [30] so that subjects initiate the cognitive challenge without being prompted. By contrast, the auditory Stroop test requires the subject to react to an external event. The results of this study imply that the nature of the cognitive task plays a role



in the interaction between the cognitive task and the physical task. However, further studies are needed to investigate the effect of instruction on task prioritization and the nature of cognitive task on dual-tasking performance in stroke survivors.

The second hypothesis that the dual-tasking performance of the stroke survivors would be worse than that of the controls was supported by this study. According to the theory of competition for attentional resources when dual-tasking, the increased demand for resources to conduct the individual tasks has a detrimental effect on dual-tasking performance [12, 26, 27]. In this study, the lower level of single-tasking performance of both the cognitive task and physical task found in stroke survivors may therefore contribute to the decreased dual-tasking ability, at least in such task combination. However, the exact mechanism that explains the poorer dual-tasking performance revealed in stroke survivors requires further investigation.

Stroke survivors in this study turned with a longer duration and a higher number of steps than the controls. This difference can be attributed to various factors such as gait asymmetry and lower limb weakness, which is common in stroke survivors. In a 180-degree turn, the inner leg acts as the axis of the turn and accepts the entire body weight. The outer leg then swings for a longer time and travels a longer distance than in straight line walking [31]. However, if the ability of the inner leg to bear the body weight is diminished, the single leg stance time would then decrease. The time and distance for the outer leg to travel would therefore be reduced. As a result, a longer time and a greater number of steps should be made to complete the turn. This may explain the difference in turning performance between stroke survivors and controls found in this study. Furthermore, the mean turning duration for stroke survivors in this study was more than  $3.18 \pm 0.28$  sec, suggesting that they exhibited some difficulty while turning [4].

The dual-task cost has been used to compare the change in performance between single-tasking and dual-tasking with the difference in single-tasking performance among the subjects being considered [25]. The insignificant between-group difference for the dual-task cost may indicate that when taking the variation in single-tasking performance into account, the demand for attentional resources when dual-tasking were similar between stroke survivors and controls.

## Limitations

One of the limitations of this study was that subjects with a stroke were relatively mobile; they were able to walk and turn unaided indoors. Besides, the mean MMSE score was 27.9 out of 30. Hence, the results of this study only apply to stroke survivors with relatively high global cognitive functioning and physical function. Further research including stroke survivors with lower cognitive and physical functions is needed to improve the generalization of the study results. Another limitation was the uneven distribution of gender between the two groups. In addition, the stroke survivors were significantly taller than the controls. The statistical analyses were conducted again by adding the gender and body height as covariates. The statistical results remained similar with the covariates added. It is therefore reasonable to assume that gender and height differences do not affect the findings of this study.

## Clinical relevancy

This study showed a poorer dual-tasking performance when turning-while-walking is the physical task in stroke survivors than in age-matched counterparts. The results suggest that such dual-tasking test may usefully be included in clinical practice, especially for those with turning difficulty. In addition, the number of steps for stroke survivors to complete the turn was relatively high, which may imply the presence of turning difficulties [4]. Given the risk of

falling when turning [3] and its potentially severe consequences [1], this activity may be included in rehabilitation programs for stroke survivors.

## Conclusions

Results from this study suggest that stroke survivors compromise cognitive task performance to perform the turning-while-walking task when dual-tasking. The behavior can be explained by the theory of competition for attentional resources and the posture-first strategy. These results differ from those of previous studies. Variations in the instruction of task prioritization and the nature of the cognitive task may explain the discrepancy. However, further studies must be carried out to examine this hypothesis.

Additionally, stroke survivors had a longer reaction time and a lower accuracy for the cognitive task when both single-tasking and dual-tasking as compared with controls. They also turned with a longer duration and more steps and took a longer time to complete the turning-while-walking task under both tasking conditions. However, the dual-task cost of all the parameters was similar between the two groups. The degraded single-tasking ability after a stroke may contribute to the poorer dual-tasking performance, but further investigation is needed to find out the exact mechanism of such phenomenon.

## Acknowledgments

The authors appreciate Mr. A Paul R Cooper for his professional advice on English editing, the subjects for their participation and Mr. Edward Xiao for his effort on data collection.

## Author Contributions

**Conceptualization:** Wing-nga Chan, William Wai-nam Tsang.

**Data curation:** Wing-nga Chan.

**Formal analysis:** Wing-nga Chan, William Wai-nam Tsang.

**Investigation:** Wing-nga Chan.

**Methodology:** Wing-nga Chan, William Wai-nam Tsang.

**Project administration:** Wing-nga Chan.

**Resources:** William Wai-nam Tsang.

**Supervision:** William Wai-nam Tsang.

**Validation:** William Wai-nam Tsang.

**Visualization:** Wing-nga Chan.

**Writing – original draft:** Wing-nga Chan.

**Writing – review & editing:** Wing-nga Chan, William Wai-nam Tsang.

## References

1. Cumming RG, Klineberg RJ. Fall frequency and characteristics and the risk of hip fractures. *J Am Geriatr Soc.* 1994; 42(7):774–778. PMID: [8014355](https://pubmed.ncbi.nlm.nih.gov/8014355/)
2. Kelly-Hayes M, Beiser A, Kase CS, Scaramucci A, D'Agostino RB, Wolf PA. The influence of gender and age on disability following ischemic stroke: the Framingham study. *J Stroke Cerebrovasc Dis.* 2003; 12(3):119–126. [https://doi.org/10.1016/S1052-3057\(03\)00042-9](https://doi.org/10.1016/S1052-3057(03)00042-9) PMID: [17903915](https://pubmed.ncbi.nlm.nih.gov/17903915/)
3. Shumway-Cook A, Woollacott M. *Motor control: Translating research into clinical practice.* 3rd ed. Philadelphia, Pa: Lippincott Williams & Wilkins; 2007.

4. Thigpen MT, Light KE, Creel GL, Flynn SM. Turning difficulty characteristics of adults aged 65 years or older. *Phys Ther.* 2000; 80(12):1174–1187. PMID: [11087304](#)
5. Hollands KL, Pelton T, Wimperis A, Whitham D, Jowett S, Sackley C, et al. Visual cue training to improve walking and turning after stroke: a study protocol for a multi-centre, single blind randomised pilot trial. *Trials.* 2013;2013: 14:276. <https://doi.org/10.1186/1745-6215-14-276> PMID: [24004882](#)
6. Lam T, Luttmann K. Turning capacity in ambulatory individuals poststroke. *Am J Phys Med Rehabil.* 2009; 88(11):873–883. <https://doi.org/10.1097/PHM.0b013e3181bc0ddf> PMID: [19893383](#)
7. Dite W, Temple VA. Development of a clinical measure of turning for older adults. *Am J Phys Med Rehabil.* 2002; 81(11):857–866. <https://doi.org/10.1097/01.PHM.0000030730.93135.50> PMID: [12394998](#)
8. Bonnyaud C, Pradon D, Bensmail D, Roche N. Dynamic stability and risk of tripping during the Timed Up and Go test in hemiparetic and healthy subjects. *PLoS One.* 2015; 10(10):e0140317. <https://doi.org/10.1371/journal.pone.0140317> PMID: [26469345](#)
9. Lamontagne A, Fung J. Gaze and postural reorientation in the control of locomotor steering after stroke. *Neurorehabil Neural Repair.* 2009; 23(3):256–266. <https://doi.org/10.1177/1545968308324549> PMID: [19060133](#)
10. Baetens T, de Kegel A, Palmans T, Oostra K, Vanderstraeten G, Cambier D. Gait analysis with cognitive-motor dual tasks to distinguish fallers from nonfallers among rehabilitating stroke patients. *Arch Phys Med Rehabil.* 2013; 94(4):680–686. <https://doi.org/10.1016/j.apmr.2012.11.023> PMID: [23187040](#)
11. Plummer-D'Amato P, Altmann LJ, Behrman AL, Marsiske M. Interference between cognition, double-limb support, and swing during gait in community-dwelling individuals poststroke. *Neurorehabil Neural Repair.* 2010; 24(6):542–549. <https://doi.org/10.1177/1545968309357926> PMID: [20424190](#)
12. Woollacott M, Shumway-Cook A. Attention and the control of posture and gait: a review of an emerging area of research. *Gait Posture.* 2002; 16(1):1–14. PMID: [12127181](#)
13. Smulders K, van Swigchem R, de Swart BJ, Geurts AC, Weerdesteyn V. Community-dwelling people with chronic stroke need disproportionate attention while walking and negotiating obstacles. *Gait Posture.* 2012; 36(1):127–132. <https://doi.org/10.1016/j.gaitpost.2012.02.002> PMID: [22418584](#)
14. Manaf H, Justine M, Ting GH, Latiff LA. Comparison of gait parameters across three attentional loading conditions during timed up and go test in stroke survivors. *Top Stroke Rehabil.* 2014; 21(2):128–136. <https://doi.org/10.1310/tsr2102-128> PMID: [24710973](#)
15. Manaf H, Justine M, Omar M. Functional balance and motor impairment correlations with gait parameters during timed Up and Go test across three attentional loading conditions in stroke survivors. *Stroke Res Treat.* 2014; 2014:439304. <https://doi.org/10.1155/2014/439304> PMID: [24757575](#)
16. Manaf H, Justine M, Goh HT. Axial segmental coordination during turning: Effects of stroke and attentional loadings. *Motor Control.* 2017; 21(1):42–57. <https://doi.org/10.1123/mc.2015-0040> PMID: [26595318](#)
17. Hollands KL, Agnihotri D, Tyson SF. Effects of dual task on turning ability in stroke survivors and older adults. *Gait Posture.* 2014; 40(4):564–569. <https://doi.org/10.1016/j.gaitpost.2014.06.019> PMID: [25086799](#)
18. Lam LC, Tam CW, Lui VW, Chan WC, Chan SS, Wong S, et al. Prevalence of very mild and mild dementia in community-dwelling older Chinese people in Hong Kong. *Int Psychogeriatr.* 2008; 20(1):135–148. <https://doi.org/10.1017/S1041610207006199> PMID: [17892609](#)
19. Royall DR, Lauterbach EC, Cummings JL, Reeve A, Rummans TA, Kaufer DI, et al. Executive control function: a review of its promise and challenges for clinical research. *J Neuropsychiatry Clin Neurosci.* 2002; 14(4):377–405. <https://doi.org/10.1176/jnp.14.4.377> PMID: [12426407](#)
20. Rozenblatt S. Stroop color word test (adult). In: Kreutzer J, Caplan B, DeLuca J, editors. *Encyclopedia of Clinical Neuropsychology.* SpringerLink e-books; 2011. p. 2404–2405.
21. Chan WN, Xiao J, Tsang WVN. Comparing dual-tasking performance, with turning-while-walking as physical task, between healthy older adults and chronic stroke survivors. *Proceedings of the 10th Singapore-International Physiotherapy Congress; 2016 Oct 29–30; Singapore.*
22. Salarian A, Horak FB, Zampieri C, Carlson-Kuhta P, Nutt JG, Aminian K. iTUG, a sensitive and reliable measure of mobility. *IEEE Trans Neural Syst Rehabil Eng.* 2010; 18(3):303–310. <https://doi.org/10.1109/TNSRE.2010.2047606> PMID: [20388604](#)
23. APDM. *Mobility Lab User's Guide.* APDM. 18 August 2014. [http://share.apdm.com/mobility\\_lab/docs/MobilityLab\\_UserGuide.pdf](http://share.apdm.com/mobility_lab/docs/MobilityLab_UserGuide.pdf). Cited 1 November 2016.
24. Hyndman D, Ashburn A, Stack E. Fall events among people with stroke living in the community: circumstances of falls and characteristics of fallers. *Arch Phys Med Rehabil.* 2002; 83(2):165–170. <https://doi.org/10.1053/apmr.2002.28030> PMID: [11833018](#)

25. McCulloch KL, Mercer V, Giuliani C, Marshall S. Development of a clinical measure of dual-task performance in walking: reliability and preliminary validity of the walking and remembering test. *J Geriatr Phys Ther.* 2009; 32(1):2–9. PMID: [19856629](#)
26. Lacour M, Bernard-Demanze L, Dumitrescu M. Posture control, aging, and attention resources: models and posture-analysis methods. *Neurophysiol Clin.* 2008; 38(6):411–421. <https://doi.org/10.1016/j.neucli.2008.09.005> PMID: [19026961](#)
27. Yogev-Seligmann G, Hausdorff JM, Giladi N. Do we always prioritize balance when walking? Towards an integrated model of task prioritization. *Mov Disord.* 2012; 27(6):765–770. <https://doi.org/10.1002/mds.24963> PMID: [22419512](#)
28. Plummer P, Eskes G, Wallace S, Giuffrida C, Fraas M, Campbell G, et al. Cognitive-motor interference during functional mobility after stroke: state of the science and implications for future research. *Arch Phys Med Rehabil.* 2013; 94(12):2565–2574. <https://doi.org/10.1016/j.apmr.2013.08.002> PMID: [23973751](#)
29. Tsang WW, Lam NK, Lau KN, Leung HC, Tsang CM, Lu X. The effects of aging on postural control and selective attention when stepping down while performing a concurrent auditory response task. *Eur J Appl Physiol.* 2013; 113(12):3021–3026. <https://doi.org/10.1007/s00421-013-2740-6> PMID: [24091870](#)
30. Al-Yahya E, Dawes H, Smith L, Dennis A, Howells K, Cockburn J. Cognitive motor interference while walking: a systematic review and meta-analysis. *Neurosci Biobehav Rev.* 2011; 35(3):715–728. <https://doi.org/10.1016/j.neubiorev.2010.08.008> PMID: [20833198](#)
31. Hollands KL, Hollands MA, Zietz D, Wing AM, Wright C, van Vliet P. Kinematics of turning 180 degrees during the timed up and go in stroke survivors with and without falls history. *Neurorehabil Neural Repair.* 2010; 24(4):358–367. <https://doi.org/10.1177/1545968309348508> PMID: [19822720](#)
